# Supplementary material
Source: PubMed Central journal article supplement (PMC1971204)
Supplement: bmj_39314.620174.80_1.pdf [file bmj_39314.620174.80_1.pdf]

## Web references

- w1. Masoudi FA, Inzucchi SE, Wang Y, Havranek EP, Foody JM, Krumholz HM. Thiazolidinediones, metformin, and outcomes in older patients with diabetes and heart failure: an observational study. *Circulation* 2005; 111(5):583-590.
- w2. Eurich DT, Majumdar SR, McAlister FA, Tsuyuki RT, Johnson JA. Improved Clinical Outcomes Associated With Metformin in Patients With Diabetes and Heart Failure. *Diabetes Care* 2005; 28(10):2345-2351.
- w3. Inzucchi SE, Masoudi FA, Wang YF, Kosiborod M, Foody JM, Setaro JF et al. Insulin-sensitizing antihyperglycemic drugs and mortality after acute myocardial infarction - Insights from the National Heart Care Project. *Diabetes Care* 2005; 28(7):1680-1689.
- w4. Pocock SJ, Wang D, Pfeffer MA, Yusuf S, McMurray JJ, Swedberg KB et al. Predictors of mortality and morbidity in patients with chronic heart failure. *Eur Heart J* 2006; 27(1):65-75.
- w5. Smooke S, Horwich TB, Fonarow GC. Insulin-treated diabetes is associated with a marked increase in mortality in patients with advanced heart failure. *Am Heart J* 2005;149(1):168-174.
- w6. Murcia AM, Hennekens CH, Lamas GA, Jimenez-Navarro M, Rouleau JL, Flaker GC et al. Impact of diabetes on mortality in patients with myocardial infarction and left ventricular dysfunction. *Archives of Internal Medicine* 2004; 164(20):2273-2279.
- w7. Dargie HJ, Hildebrandt PR, Riegger GA, McMurray JJ, McMorn SO, Roberts JN et al. A randomized, placebo-controlled trial assessing the effects of rosiglitazone on echocardiographic function and cardiac status in type 2 diabetic patients with New York Heart Association Functional Class I or II Heart Failure. *J Am Coll Cardiol* 2007;49(16):1696-1704.
- w8. Aguilar D, Bozkurt B, Pritchett A, Petersen NJ, Deswal A. The impact of thiazolidinedione use on outcomes in ambulatory patients with diabetes mellitus and heart failure. *J Am Coll Cardiol* 2007; 50(1):32-36.
